# Supplementary material
Source: PubMed Central journal article supplement (PMC4786630)
Supplement: cmi201509x1.pdf [file cmi201509x1.pdf]

## SUPPLEMENTARY INFORMATION

### qPCR study

Real-time quantitative PCR assays were carried out on the 7500 Real Time PCR System (Applied Biosystems). Pairs of primers were designed in Primer Quest program (<http://eu.idtdna.com/PrimerQuest/>) in order to multiply two common and four unique (two per each strain) genes harbored by the respective LOCK strains (Supplementary Table 1). Each reaction was carried out in reaction mixture containing: 1× concentrated commercial SYBR Green mixture SensiFast Low ROX (Bioline), forward and reverse specific primers (100 μM each), DNA template (in three 9, 3 and 1 ng per well, each in duplicate), and water to 10 μl of final volume. Reactions were performed with an initial denaturation step (95 °C for 3 min) followed by 40 cycles of denaturation (94 °C for 20 s) and

primer annealing-extension (60 °C for 1 min). After cycling, melting point temperature analysis was performed in the range of 60 °C to 94 °C with temperature increments of 0.33 °C. Quality of the results was evaluated based on expected  $C_t$  differences among three DNA amounts as well as product melting curves. Three concentrations of DNA allowed calculating individual efficiencies for each primers pair and normalizing all results to one, common for all genes, DNA concentration. Amount of each target gene was calculated by  $\Delta C_t$  method with geometric mean of two common genes  $C_t$ s as a reference (Vandesompele *et al.*, 2002).

Vandesompele J, de Preter K, Pattyn F, Poppe B, van Roy N, de Paepe A *et al.* Accurate normalization of real-time quantitative RT-PCR data by geometric averaging of multiple internal control genes. *Genome Biol* 2002; **3**: research0034.1–research0034.11.

## Supplemental Table 1 Primers used for qPCR:

### Common gene primers

=====  
DNA-directed RNA polymerase alpha subunit  
LbCRpaaF  
GATATCGTCGCTGATCCTG  
LbCRpaaR  
GTCAGCTGCCACATACC  
=====  
Translation elongation factor Tu:  
LbCtefaF  
GACCTTGGATCTTGGTGAAG  
LbCtefaR  
TGGATTGAACCTGGCTTTG  
Strain-specific gene primers  
Unique for *L. rhamnosus* LOCK0900  
=====  
Phage anti-repressor protein 900  
LbUpa0aF  
GGGCTGCTCTACAAAGATG  
LbUpa0aR  
AGTTGATGGATGCCAGTTAC  
=====  
Recombinational DNA repair protein RecT 900  
LbURe0aF  
CCAGTAACGCCCTCAATTC  
LbURe0aR  
CCCTTGATCACCATGTTTCAG  
Unique for *L. rhamnosus* LOCK0908  
=====  
DNA helicase, restriction/modification system component YeeB 908  
LbUYb8aF  
GGCACGAGTCTATCAACATC  
LbUYb8aR  
CCTTTCGGACACCTTGATTAG  
=====  
YeeC-like protein 908  
LbUYc8aF  
GCGAAGAAGTTGAGCTTAATG  
LbUYc8aR  
CCATACAGAGATGAGGCAAG  
=====
